# Supplementary material for: Therapeutic targeting of PD-1/PD-L1 blockade by novel small-molecule inhibitors recruits cytotoxic T cells into solid tumor microenvironment
Source: PubMed Central journal article supplement — J Immunother Cancer. 2022 Jul 21;10(7):e004695. doi: 10.1136/jitc-2022-004695 (PMC9310269; doi:10.1136/jitc-2022-004695), 2022-07-21
Supplement: jitc-2022-004695supp005.pdf [file jitc-2022-004695supp005.pdf]

## Supplementary Figure 5.

**A**WaterLOGSY (150  $\mu$ M BMS202)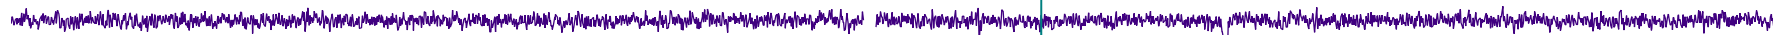**B**WaterLOGSY (5  $\mu$ M PDL1, 150  $\mu$ M BMS202)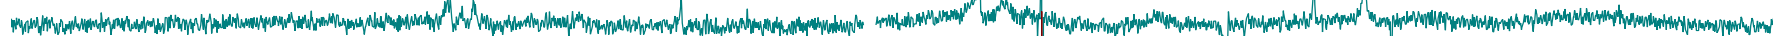**C**WaterLOGSY (150  $\mu$ M SM69)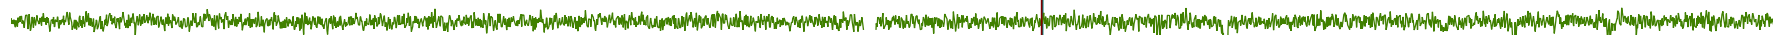**D**WaterLOGSY (5  $\mu$ M PDL1, 150  $\mu$ M SM69)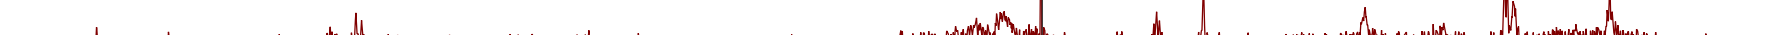

9.0 8.5 8.0 7.5 7.0 6.5 6.0 5.5 5.0 4.5 4.0 3.5 3.0 2.5 2.0 1.5 1.0 0.5 0.0  
ppm
