# Supplementary material for: Therapeutic targeting of PD-1/PD-L1 blockade by novel small-molecule inhibitors recruits cytotoxic T cells into solid tumor microenvironment
Source: PubMed Central journal article supplement — J Immunother Cancer. 2022 Jul 21;10(7):e004695. doi: 10.1136/jitc-2022-004695 (PMC9310269; doi:10.1136/jitc-2022-004695), 2022-07-21

## Supplementary Figure 7.

**A**

| Sample | Sex | Age | Tumor location     | Primary tumor/Metastasis | Primary tumor |
|--------|-----|-----|--------------------|--------------------------|---------------|
| Mel1a  | M   | 80  | Anal canal         | Primary tumor            | Melanoma      |
| Mel1b  |     |     | Inguinal region    | Metastasis               | Melanoma      |
| Mel2   | F   | 75  | Inguinal region    | Primary tumor            | Melanoma      |
| Mel3   | M   | 79  | Right foot plantar | Primary tumor            | Melanoma      |
| Mel4   | M   | 89  | Left leg           | Metastasis               | Melanoma      |
| Mel5   | F   | 71  | Inguinal region    | Metastasis               | Melanoma      |
| Mel6   | F   | 63  | Left leg           | Metastasis               | Melanoma      |
| BBM1   | F   | 38  | Bone               | Metastasis               | Breast        |
| BBM2   | F   | 58  | Bone               | Metastasis               | Breast        |
| LBM1   | M   | 60  | Bone               | Metastasis               | Lung          |

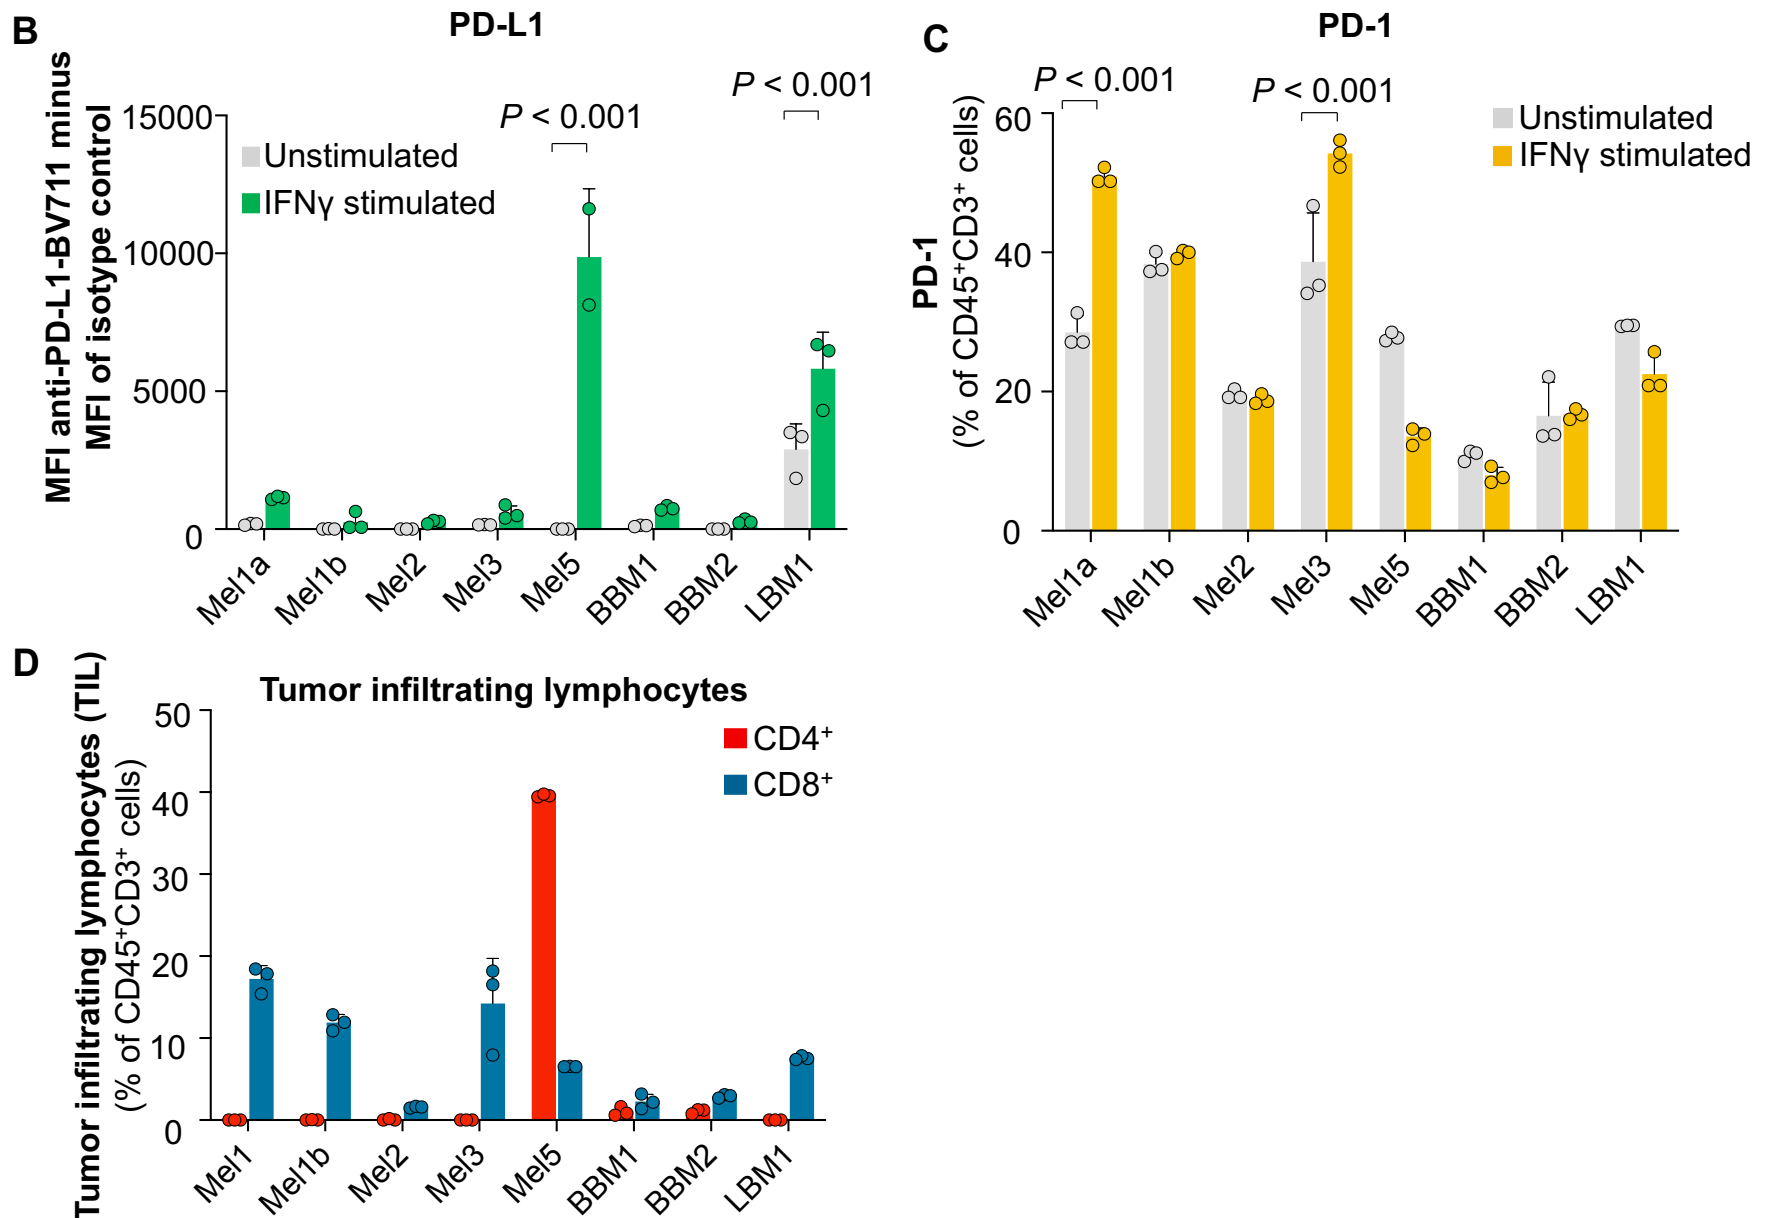

Supplement: jitc-2022-004695supp007.pdf [file jitc-2022-004695supp007.pdf]
