# Supplementary figures and images for: Therapeutic targeting of PD-1/PD-L1 blockade by novel small-molecule inhibitors recruits cytotoxic T cells into solid tumor microenvironment
Source: PubMed Central journal article supplement — J Immunother Cancer. 2022 Jul 21;10(7):e004695. doi: 10.1136/jitc-2022-004695 (PMC9310269; doi:10.1136/jitc-2022-004695), 2022-07-21

## Supplementary Figure 1.

A

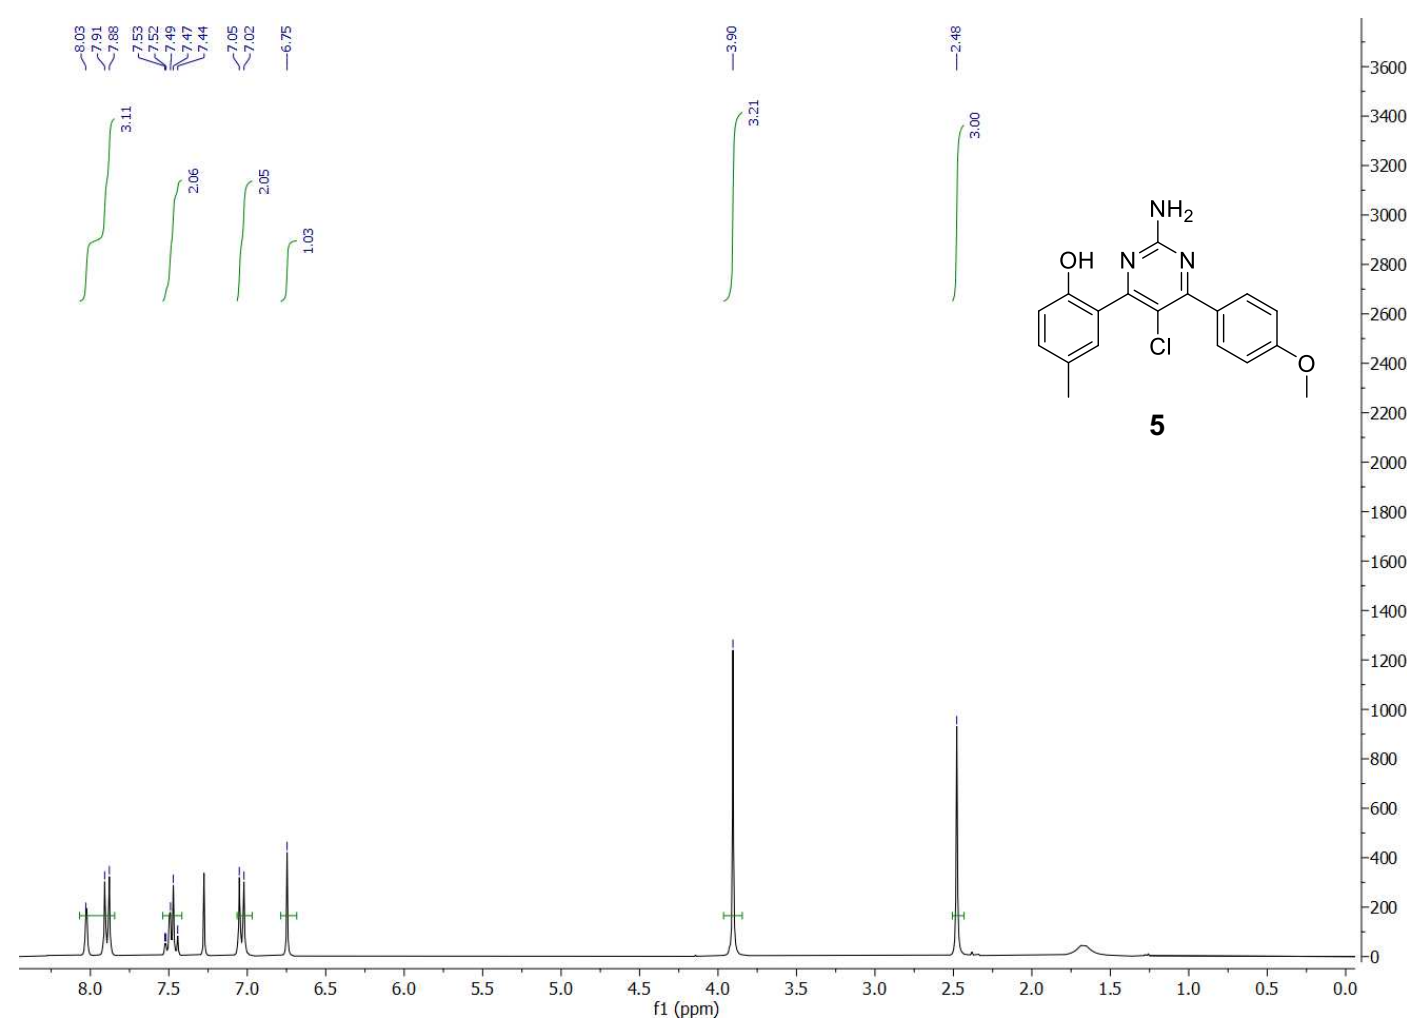

D

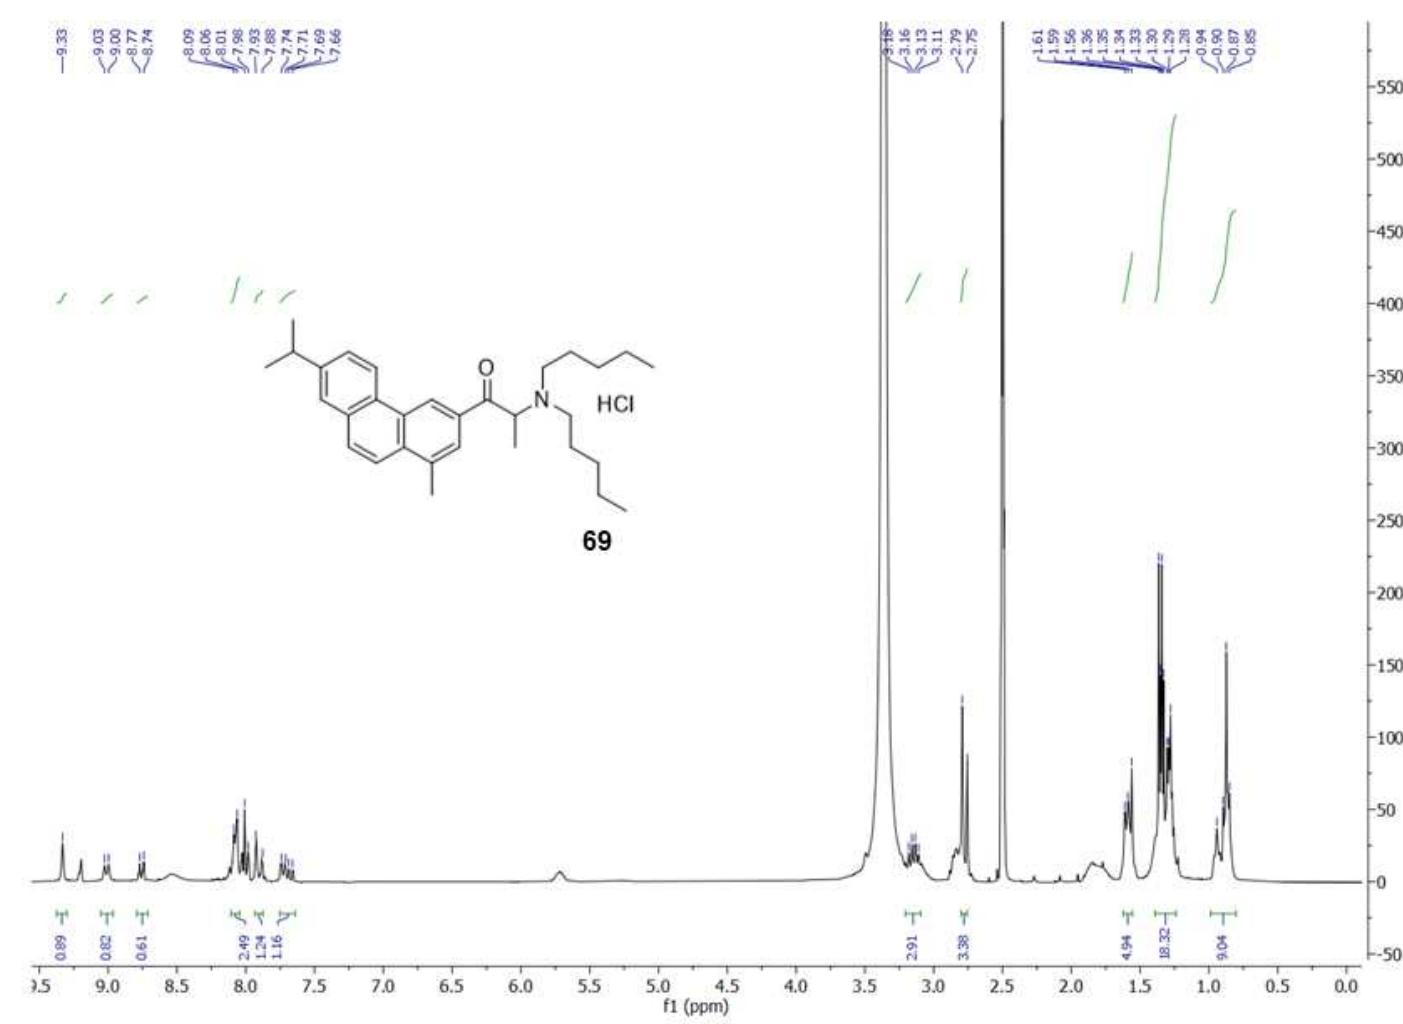

B

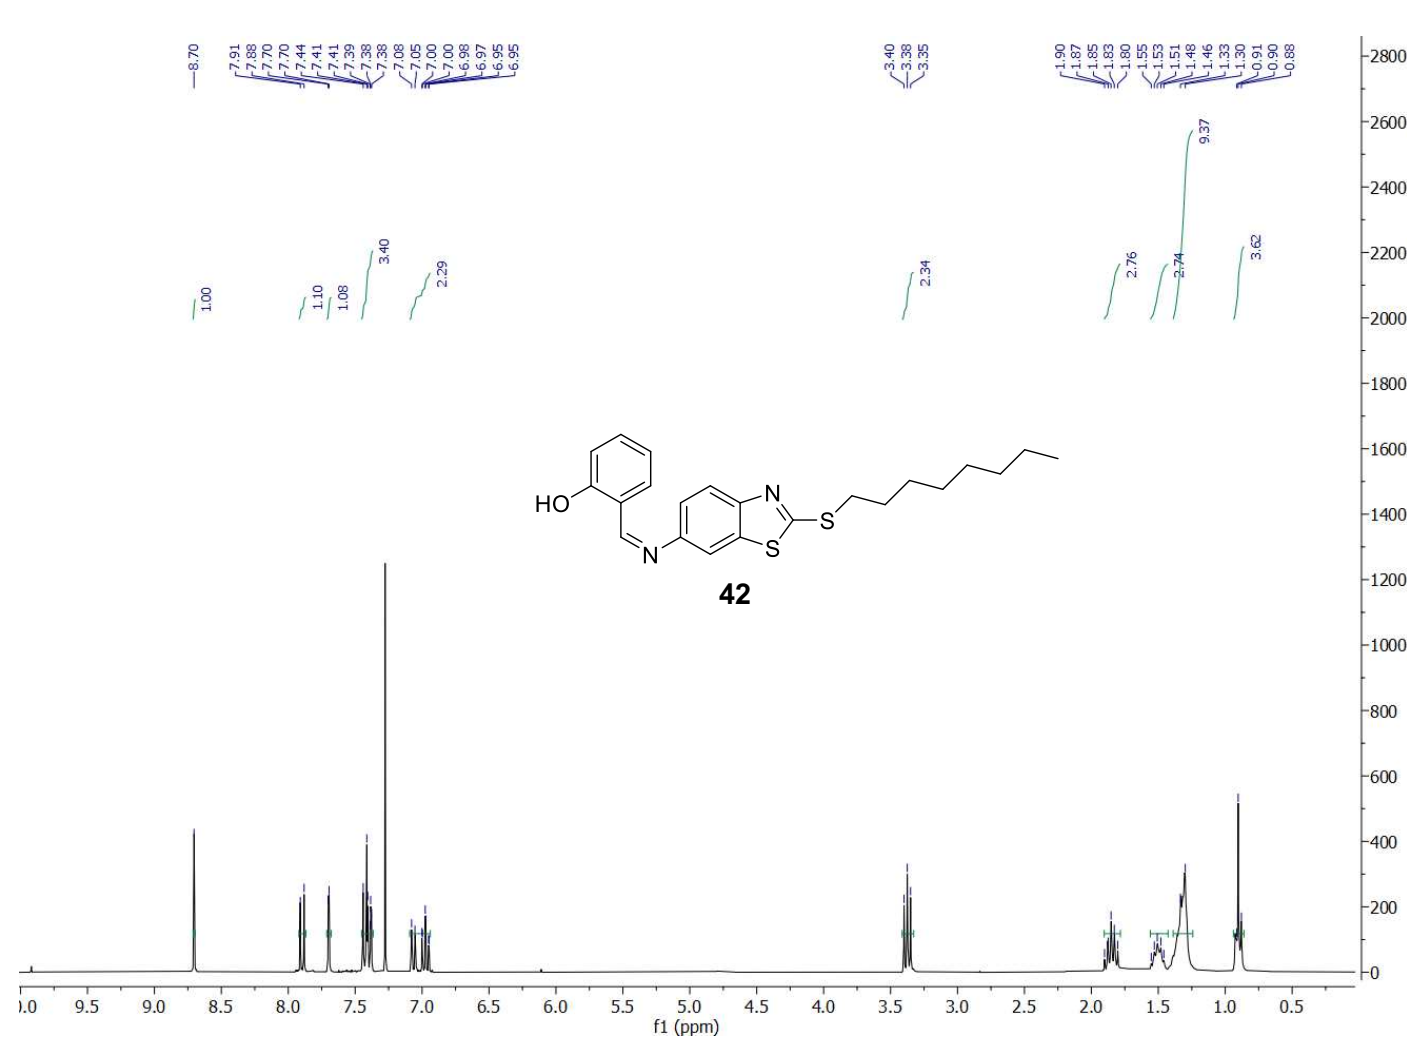

E

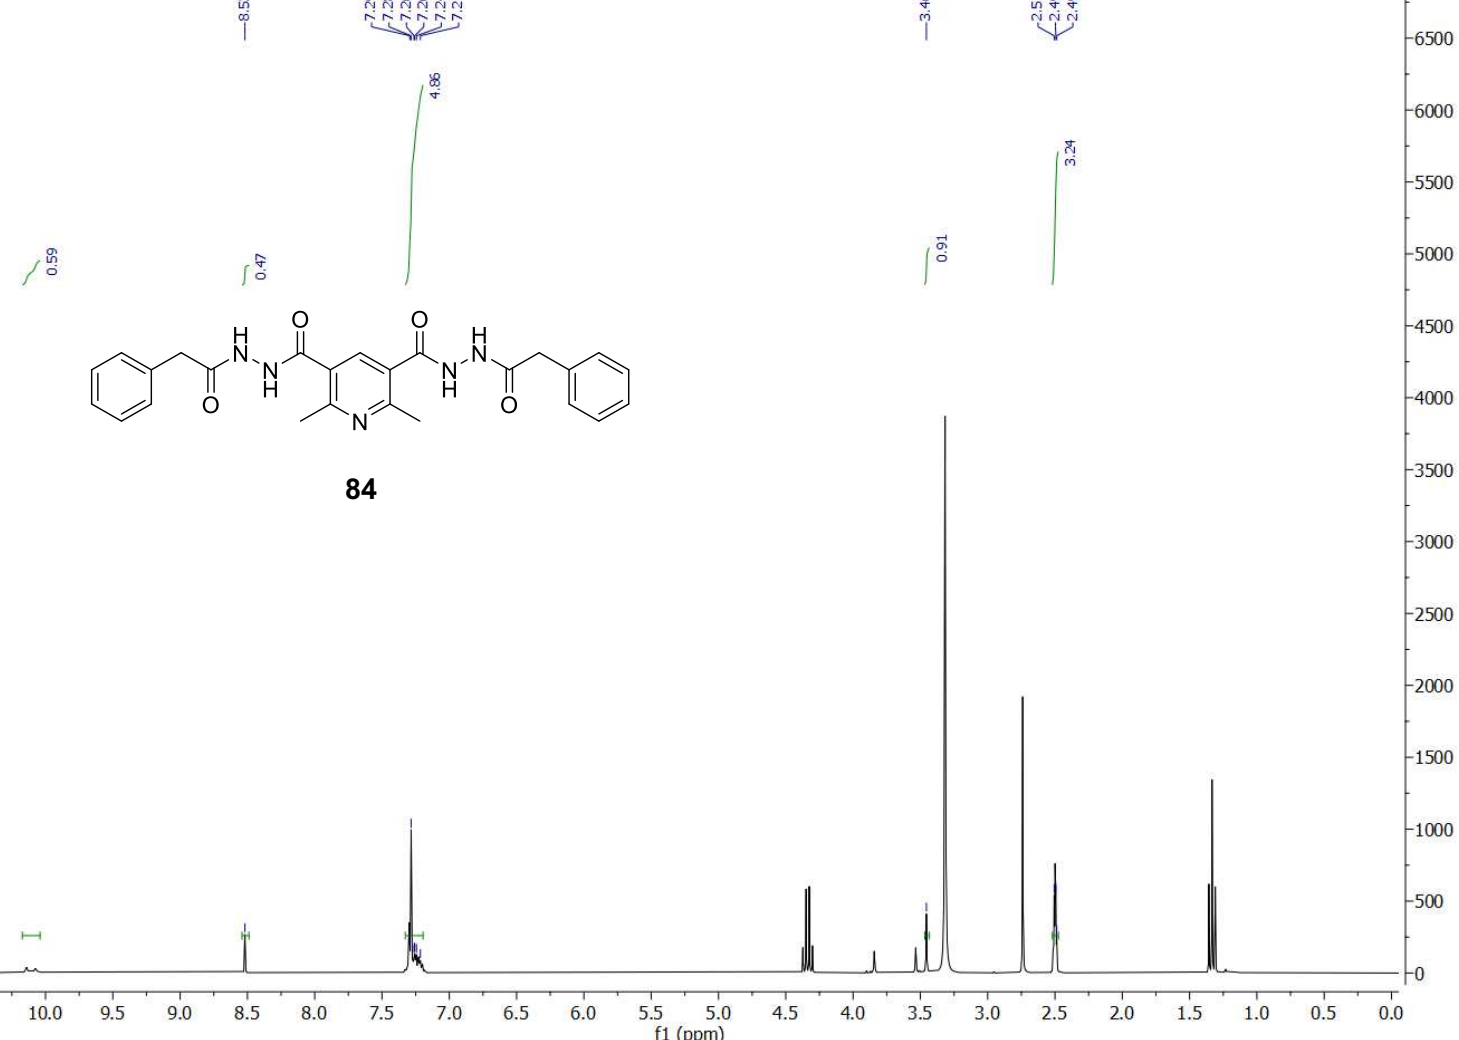

C

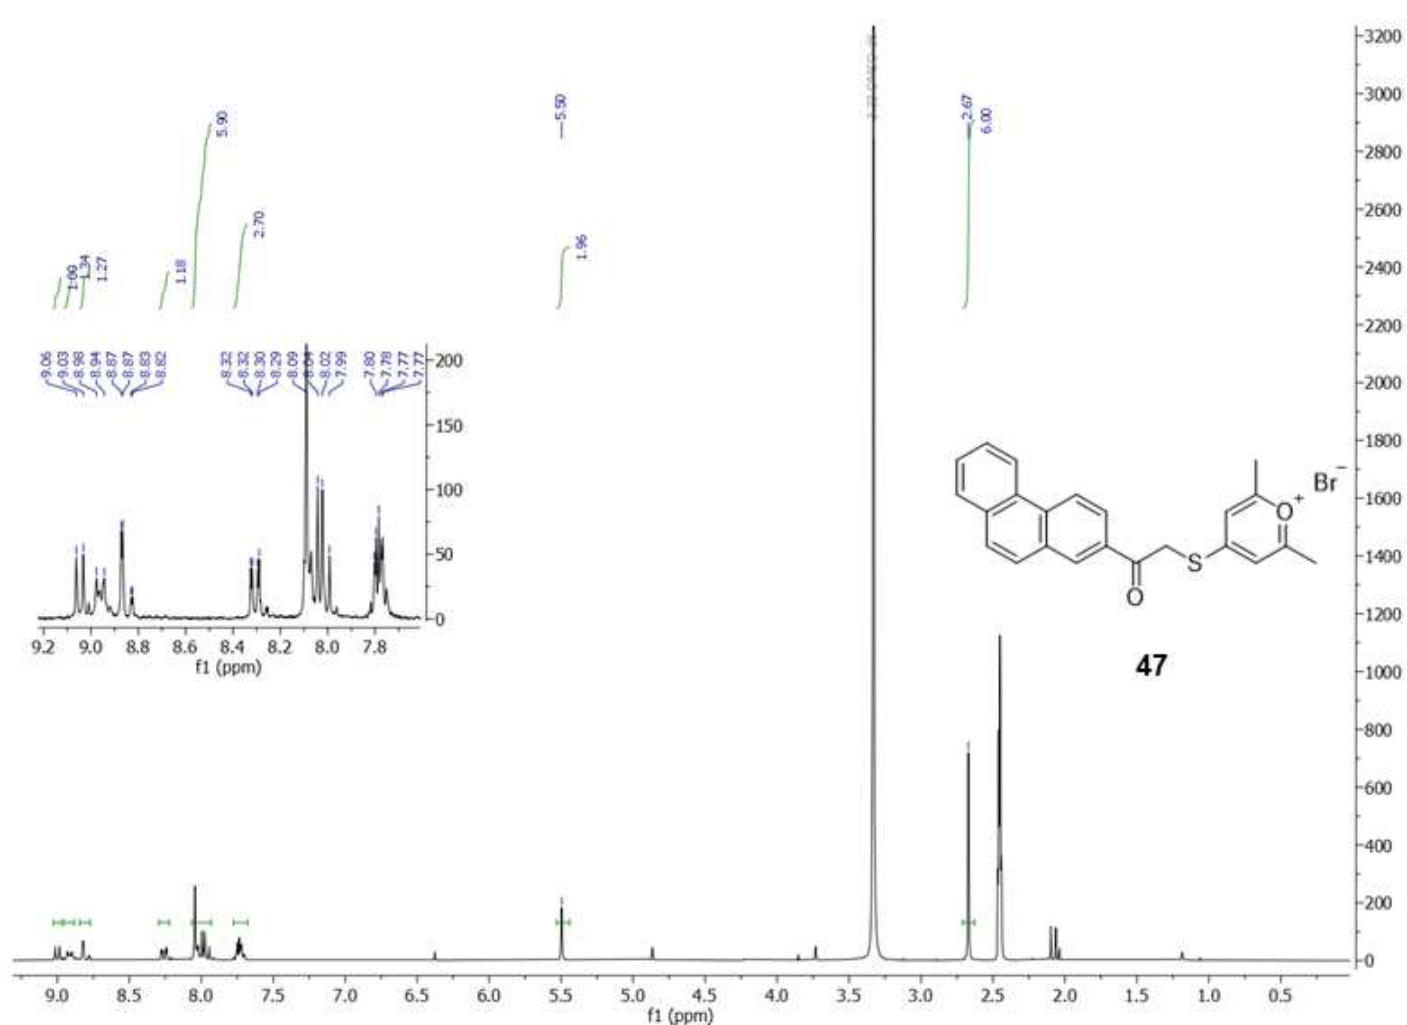

Supplement: jitc-2022-004695supp001.pdf [file jitc-2022-004695supp001.pdf]

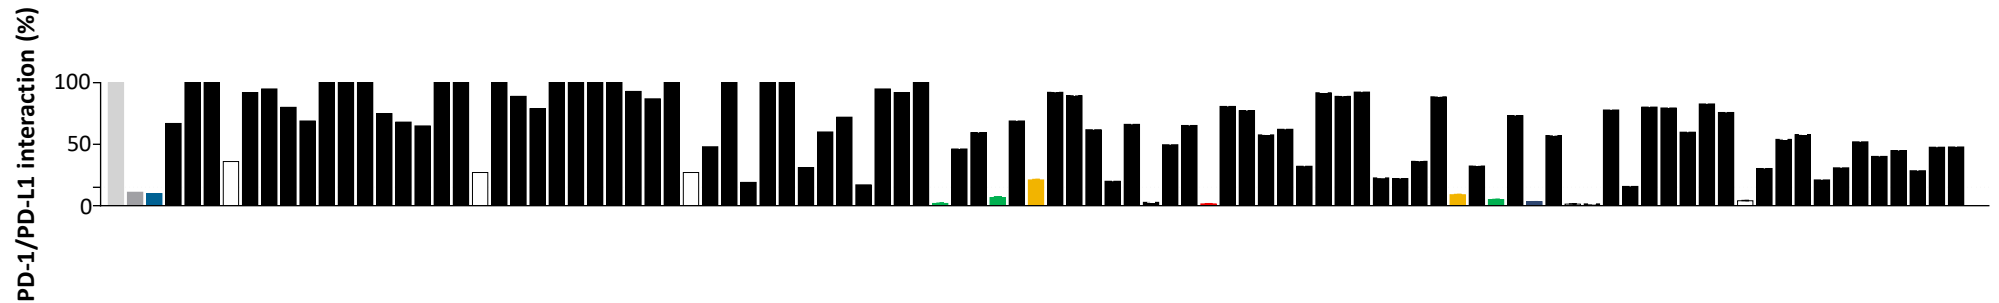

Supplement: jitc-2022-004695supp002.pdf [file jitc-2022-004695supp002.pdf]

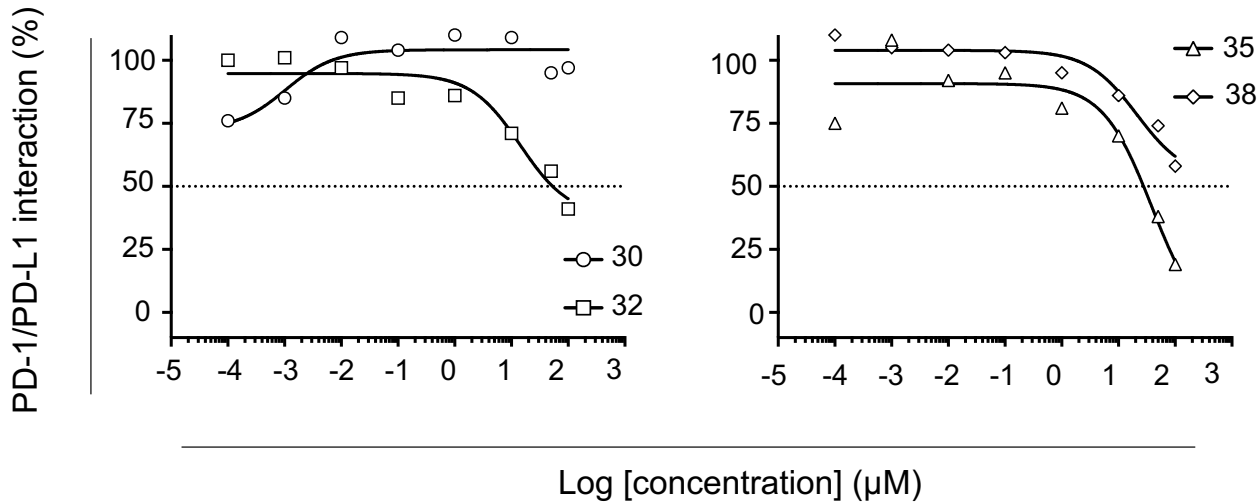

Supplement: jitc-2022-004695supp003.pdf [file jitc-2022-004695supp003.pdf]

**A**

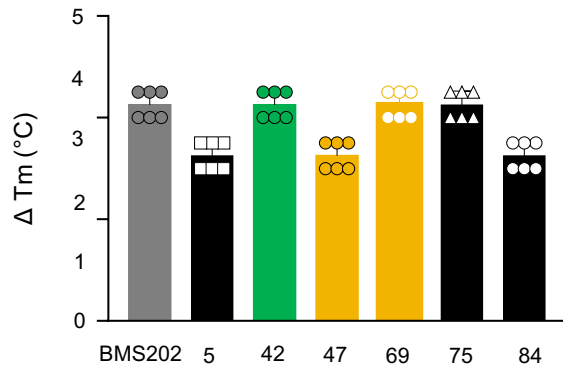

**B**

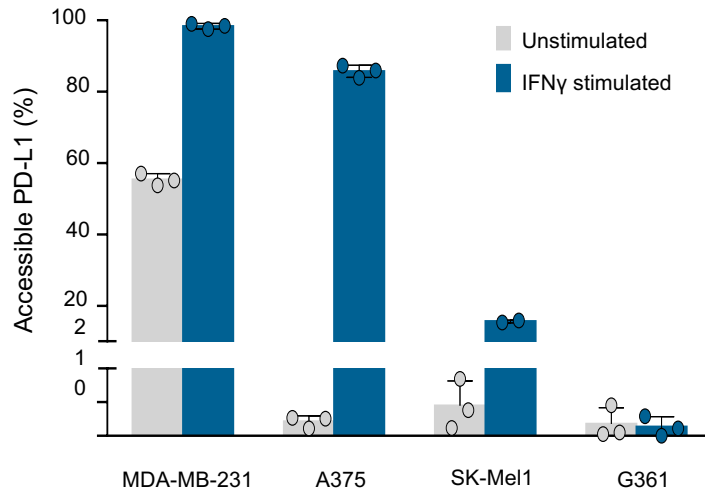

Supplement: jitc-2022-004695supp004.pdf [file jitc-2022-004695supp004.pdf]

**Supplementary Figure 6.**

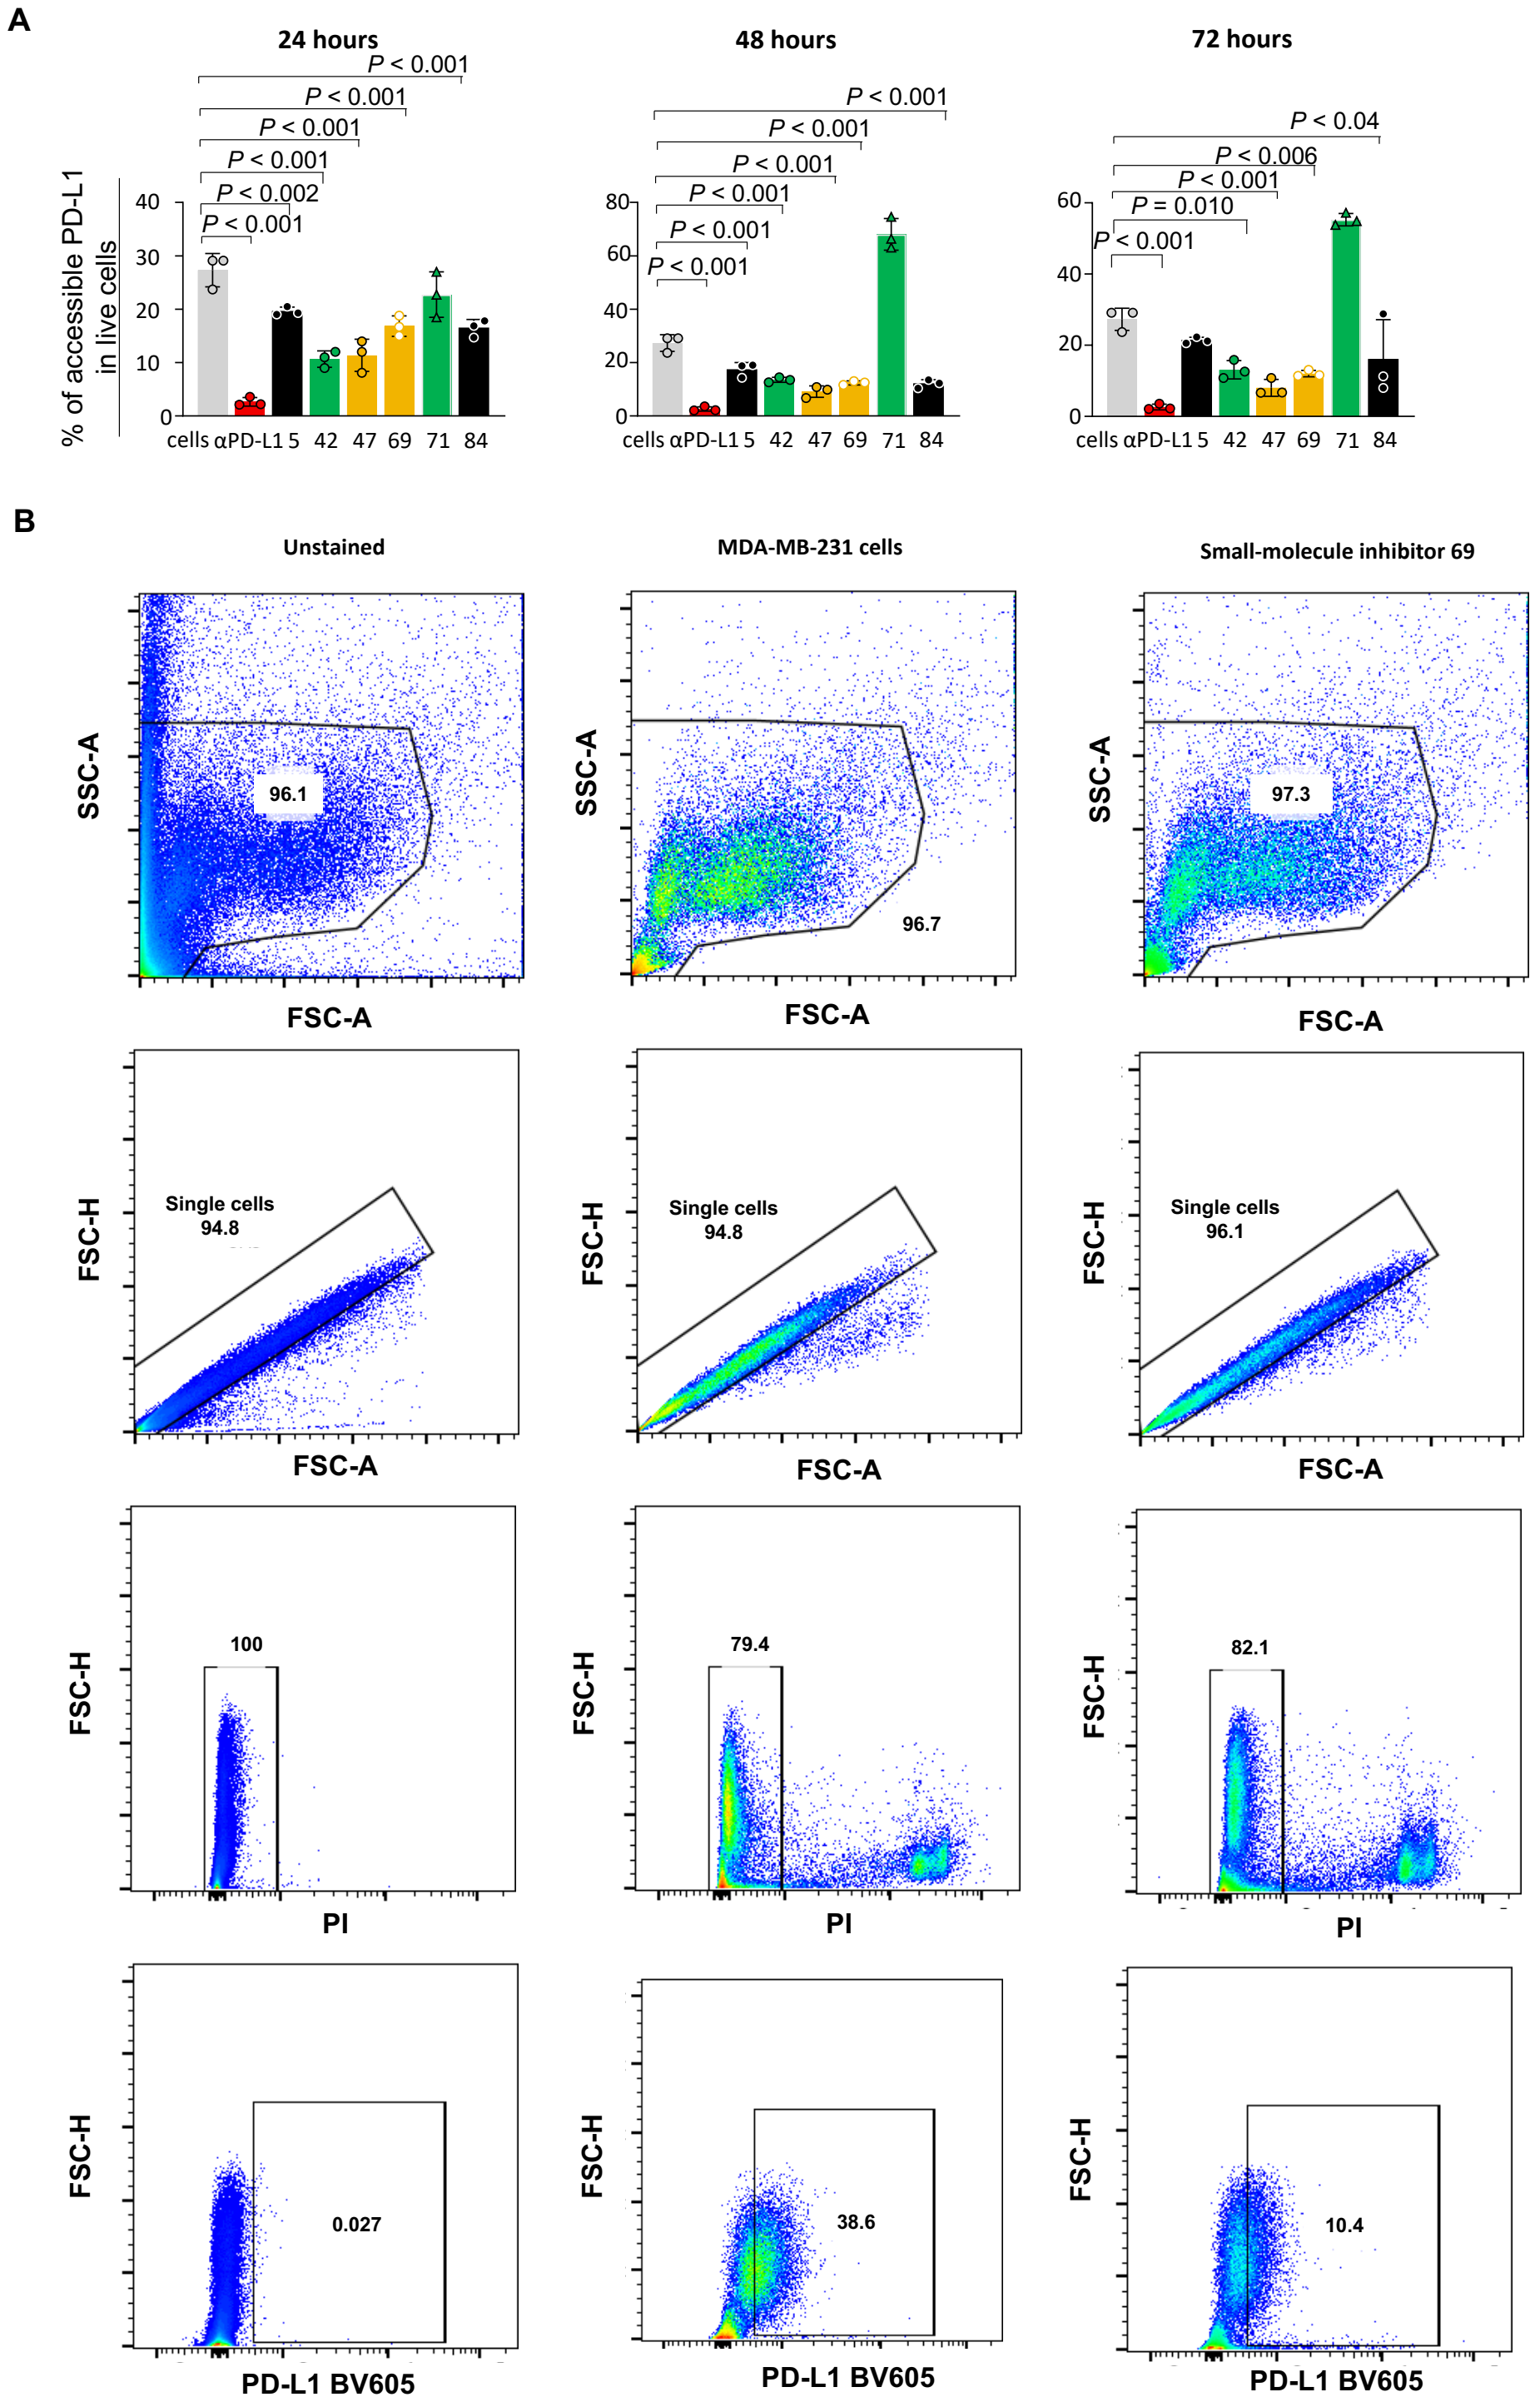

Supplement: jitc-2022-004695supp006.pdf [file jitc-2022-004695supp006.pdf]

## Supplementary Figure 8.

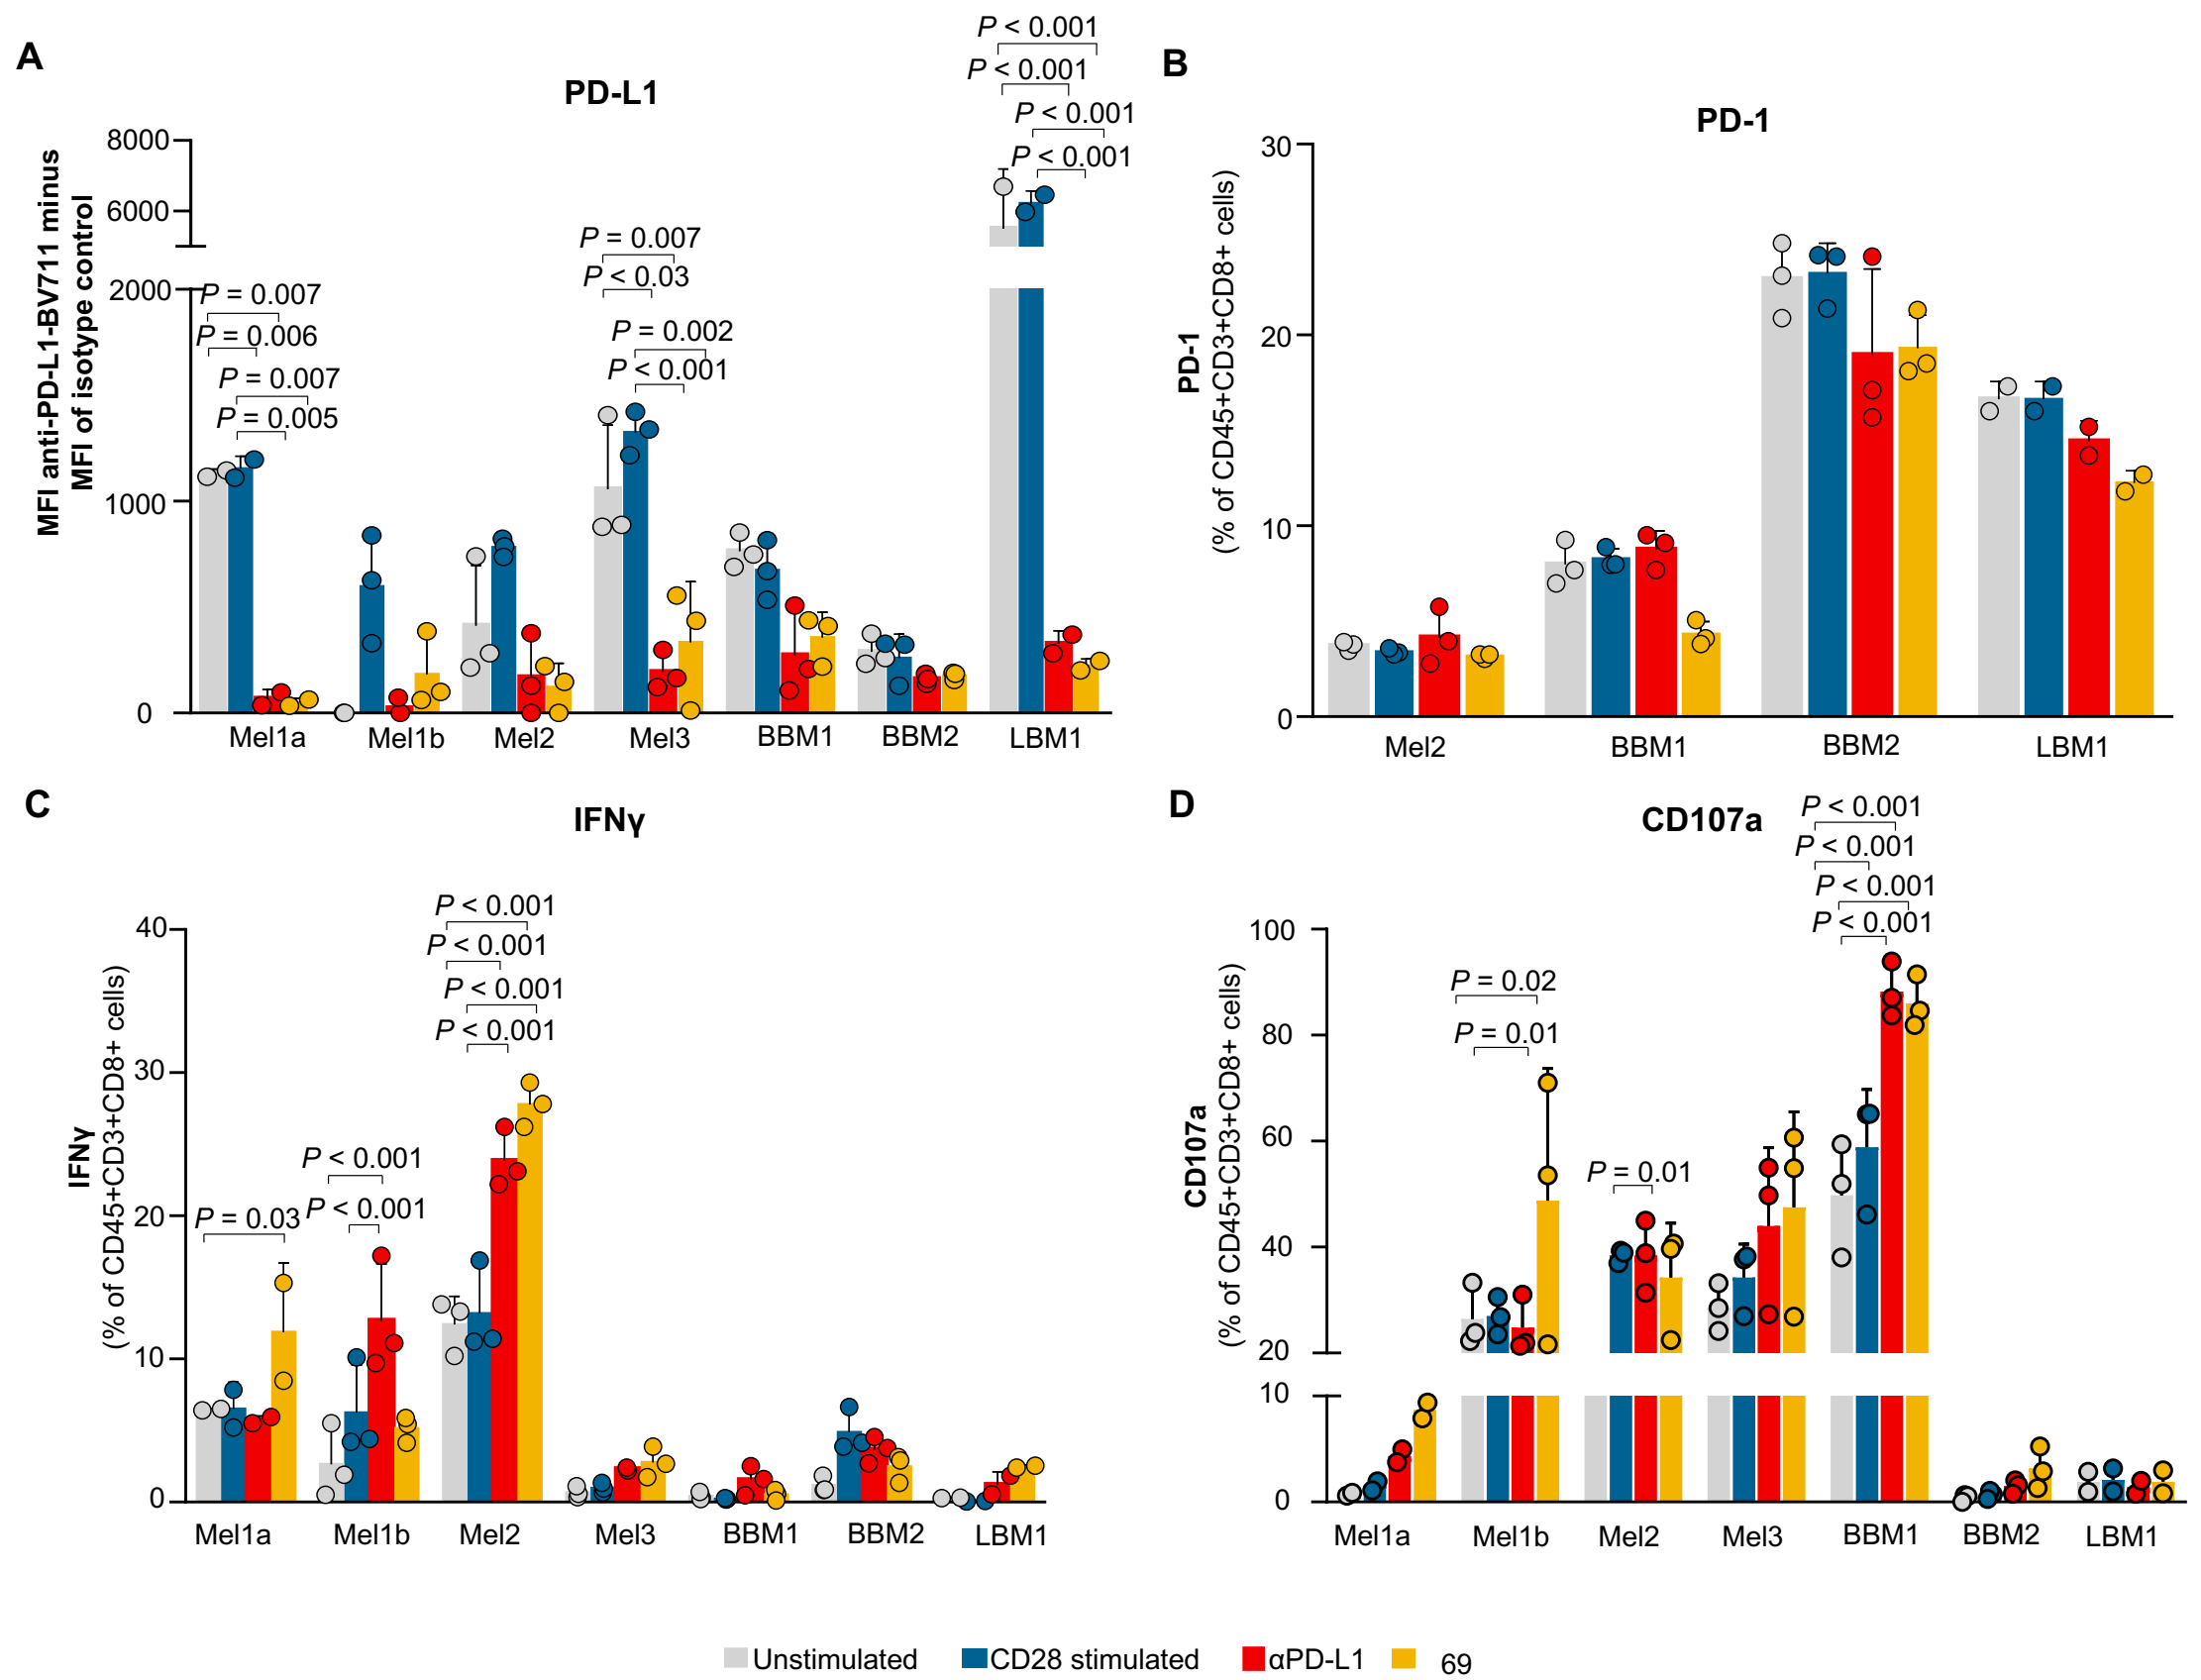

Supplement: jitc-2022-004695supp008.pdf [file jitc-2022-004695supp008.pdf]

**Supplementary Figure 9.**

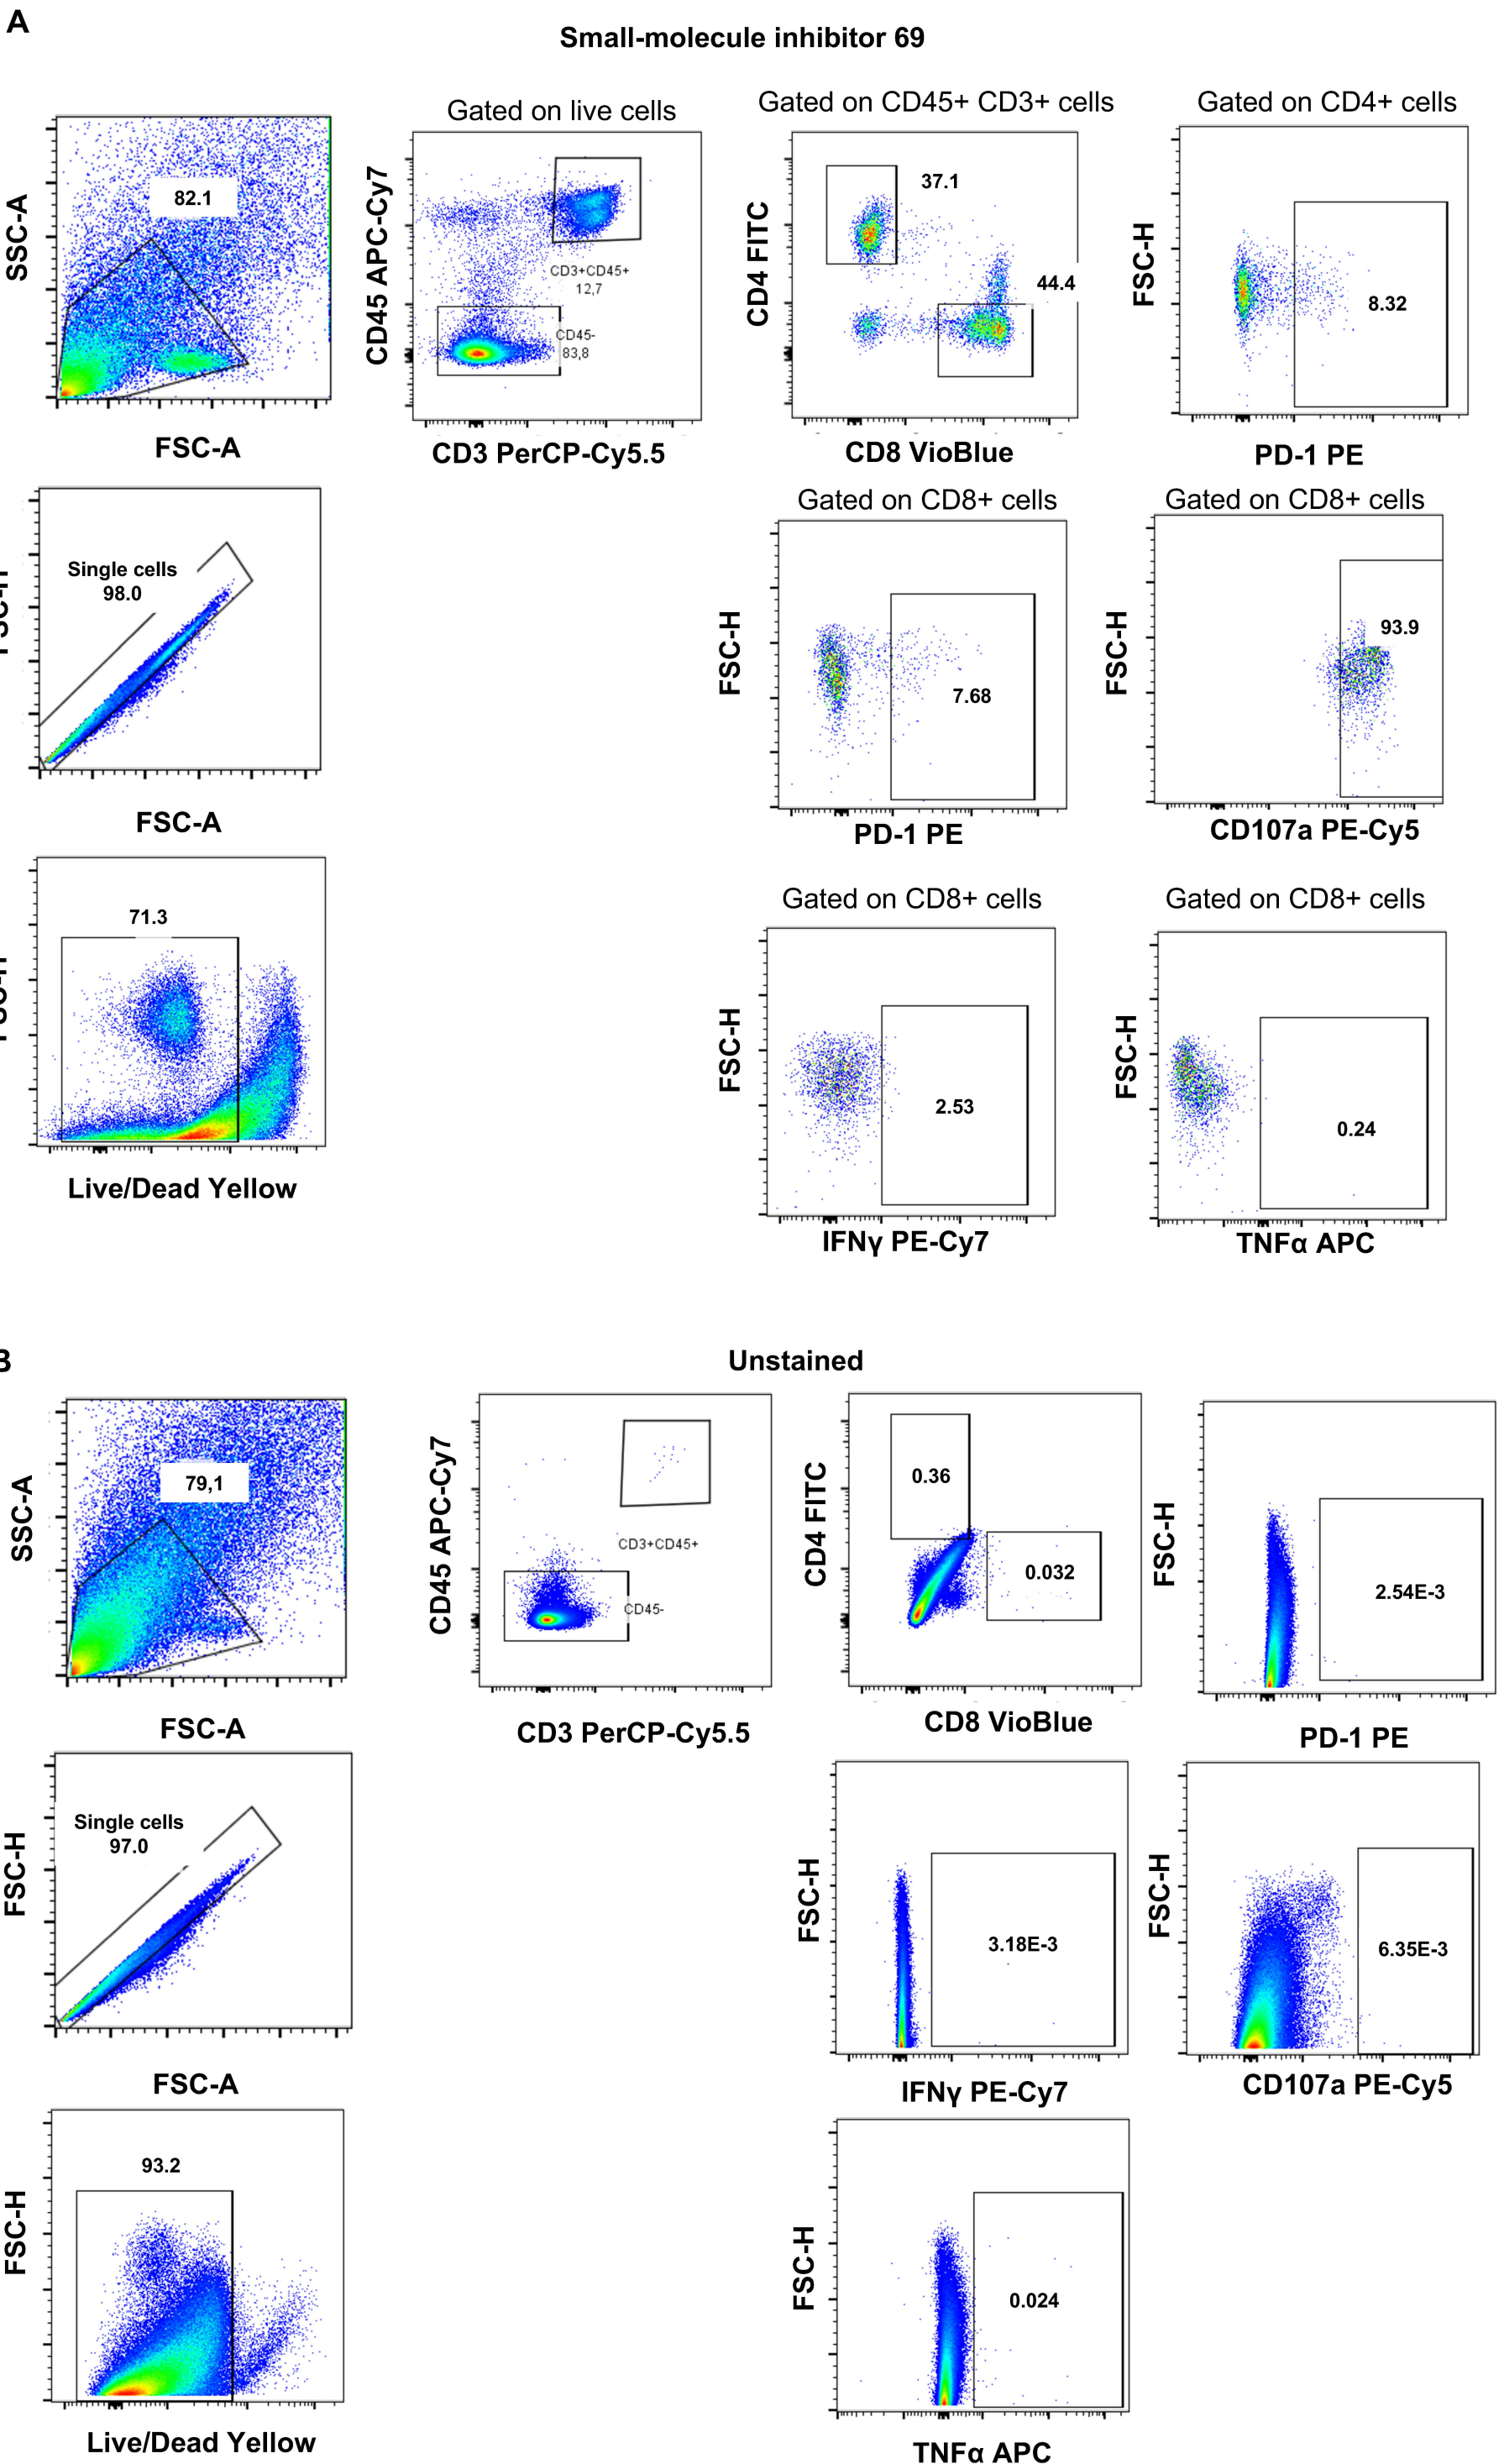

Supplement: jitc-2022-004695supp009.pdf [file jitc-2022-004695supp009.pdf]

## Supplementary Figure 10.

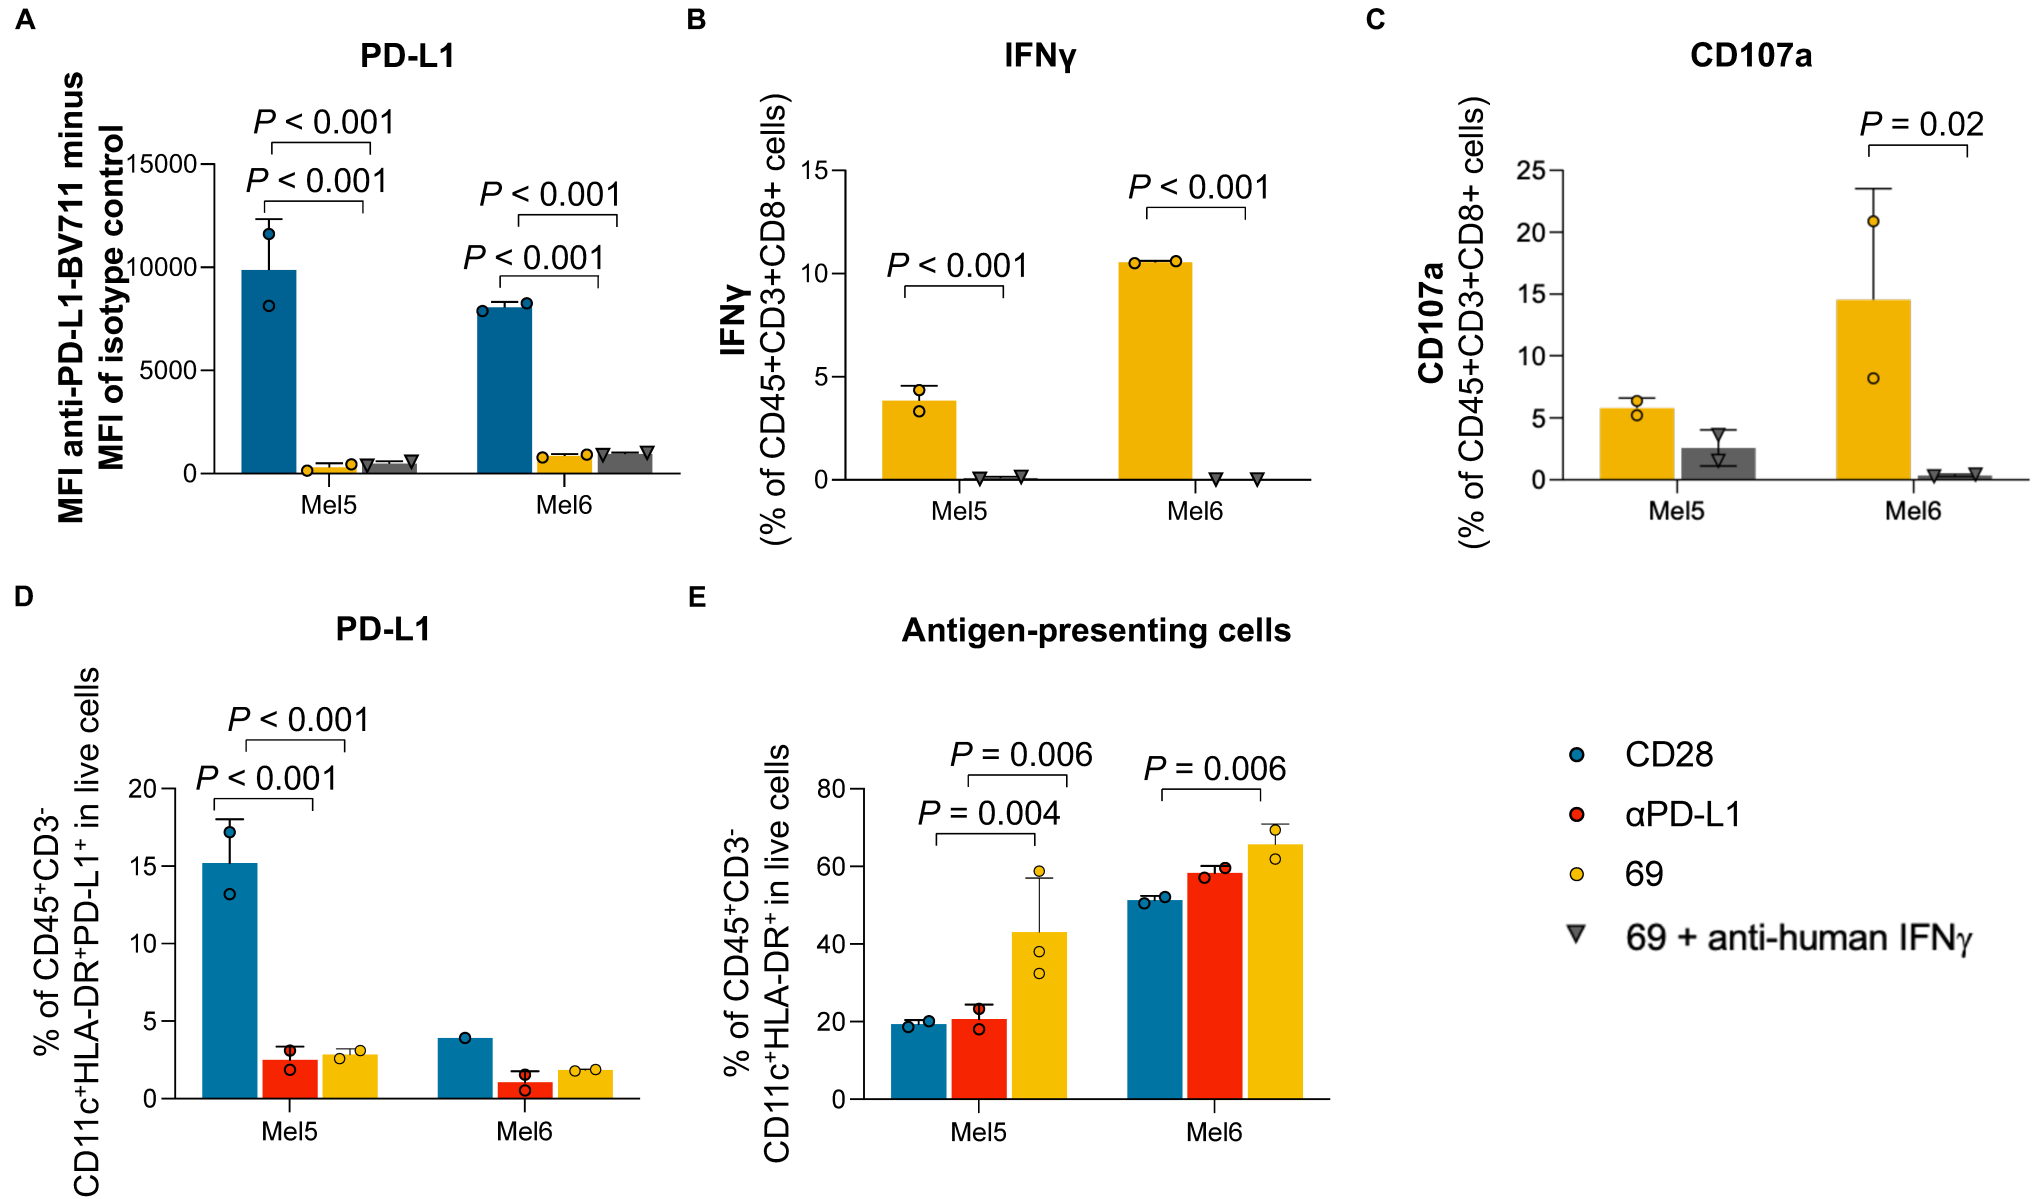

Supplement: jitc-2022-004695supp010.pdf [file jitc-2022-004695supp010.pdf]

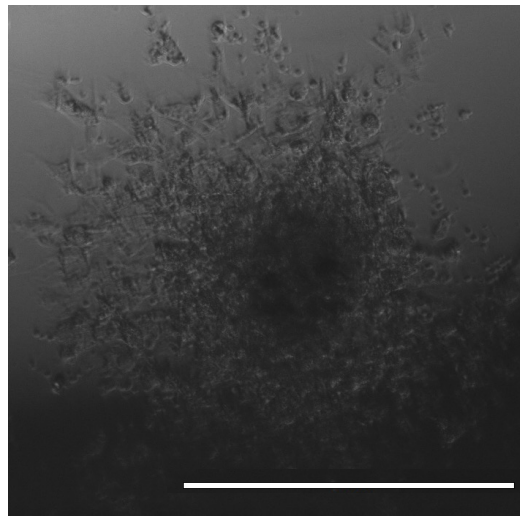

PBS

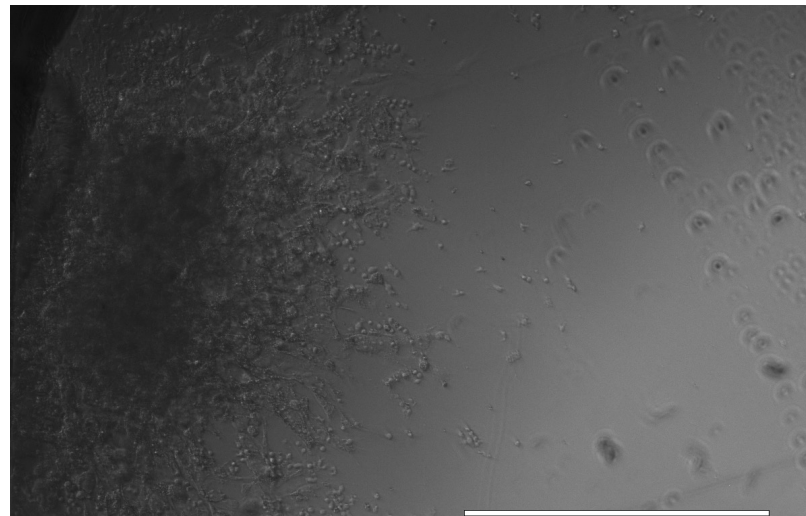

$\alpha$ PD-L1

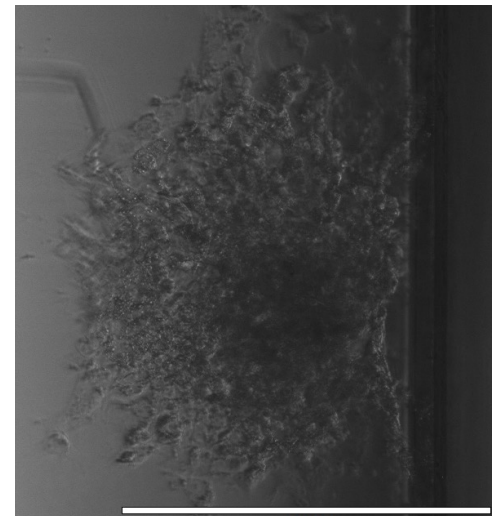

SM 69

Supplement: jitc-2022-004695supp011.pdf [file jitc-2022-004695supp011.pdf]
